# Supplementary material for: Aberrant activation of integrin α4β7 suppresses lymphocyte migration to the gut
Source: JCI journal article supplement (doi:10.1172/jci31570), 2007-09-04
Supplement: sd1 [file 1]

Figure 1

**A**

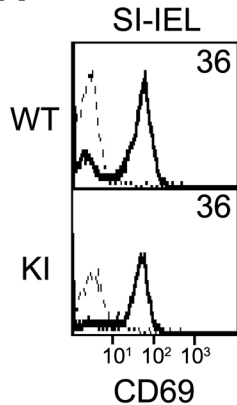

**B**

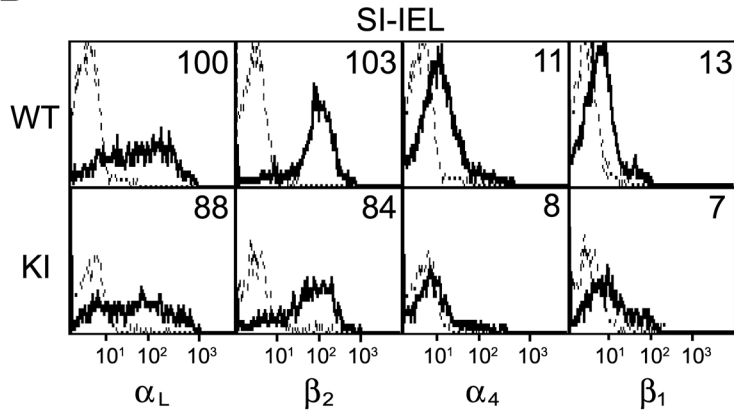

Figure S2

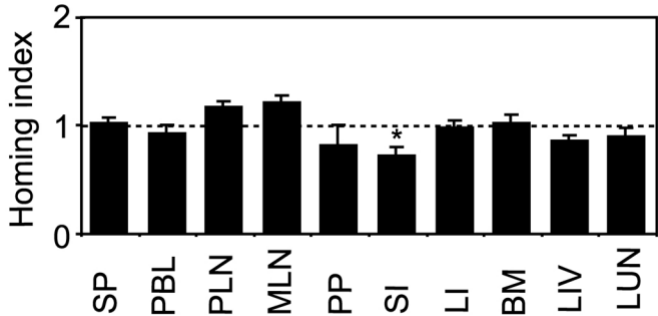

Figure S3

**A**

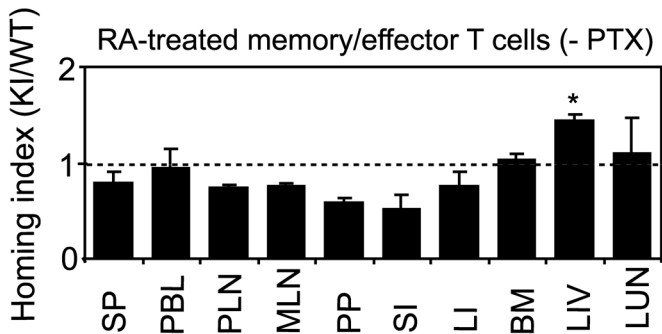

**B**

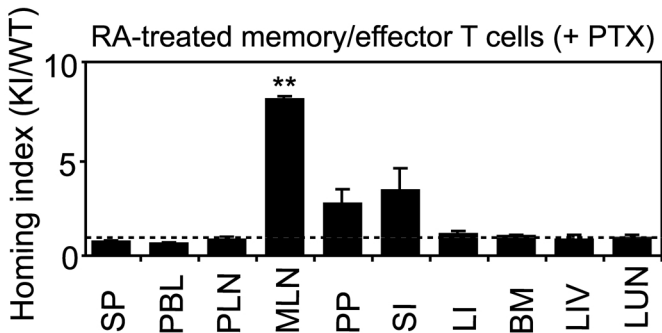

**Figure S1. Expression of cell surface receptors on lymphocytes isolated from intraepithelial cell compartments of the small intestine (SI-IEL)**

Comparable expression levels of CD69 (A) and  $\alpha_L$ ,  $\beta_2$ ,  $\alpha_4$ , and  $\beta_1$  integrins (B) were observed in SI-IEL lymphocytes from wild-type (WT) and  $\beta_7$  (D146A) (KI) mice. Reduced expression of the  $\alpha_4$  integrin was likely to be due to the reduction in  $\alpha_4\beta_7$  expression.

**Figure S2. Competitive in vivo homing assay using KI and  $\beta_7^{+/-}$  splenocytes**

Equal numbers ( $2 \times 10^7$ ) of fluorescently labeled KI and  $\beta_7^{+/-}$  cells were mixed and injected into C57BL/6J-CD45.1<sup>+</sup> congenic mice. The homing indices were determined 18 h after injection. Data are expressed as the mean values  $\pm$  SEM of three independent experiments. \*,  $P < 0.05$ , versus SP.

**Figure S3. Competitive in vivo homing assay using retinoic acid (RA)-treated memory/effector T-cells**

RA-treated memory/effector T-cells were prepared as describe in Methods. Competitive homing assay to compare  $\beta_7$  (D146A) (KI) and wild-type (WT) RA-treated memory/effector T-cells was performed as described in Methods. Cells were untreated (A) or treated (B) with PTX prior to injection into recipient mice.

**Movie 1. Representative videos of T-cells migrating on MAdCAM-1 substrates.**

Live cell imaging of retinoic acid-treated memory/effector T-cells from WT (left) and  $\beta_7$  (D146A) mice (right) on MAdCAM-1/CXCL12 substrates was performed at 37°C with a culture dish system for live-cell microscopy as described in Methods.
